# Supplementary material
Source: publisher figshare collection journal article supplement (https://geolsoc.figshare.com/ndownloader/files/17291345)
Supplement: Supplementary file 1 [file 17291345]

| **Table S2a**: Previous AFT data used in this study | | | | | | | |
| --- | --- | --- | --- | --- | --- | --- | --- |
| **Reference** | **Sample ID** | **Formation** | **Elevation** | **Latitude (°N)** | **Longitude (°E)** | **Age (Ma)** | **Error (1σ)** |
| Amaya et al., 2017 | 12SACZ-8B | Bucaramanga gneiss | 3340 | 7.240 | -72.822 | 9.8 | 4.5 |
|  | 13SACZ-32 | Giron | 3342 | 7.105 | -72.966 | 12.3 | 2.2 |
|  | 12-SACZ-31 | Orthogneiss | 3929 | 7.253 | -72.890 | 8.9 | 2.2 |
|  | 13SACZ-10 | Orthogneiss | 3297 | 7.237 | -72.817 | 7.9 | 2.3 |
|  | 13SACZ-19 | modern river sediment | 2281 | 7.175 | -72.967 | 12.6 | 2.3 |
|  | 13SACZ-21 | Silgara schist | 353 | 7.280 | -72.019 | 32.8 | 12.5 |
| Mora et al., 2015 | 1018-11 | Bucaramanga gneiss | 1072 | 7.130 | -73.106 | 28.7 | 6.4 |
|  | 1018-12 | Bucaramanga gneiss | 1354 | 7.122 | -73.085 | 15.3 | 1.1 |
|  | 1018-13 | Bucaramanga gneiss | 1684 | 7.113 | -73.069 | 19.6 | 6.8 |
|  | 1018-14 | La Corcova Quartzomonzonite | 1977 | 7.140 | -73.031 | 17.2 | 2.8 |
|  | 1018-15 | Bucaramanga gneiss | 2288 | 7.140 | -73.011 | 28.5 | 5.1 |
|  | 1018-16 | Bucaramanga gneiss | 2667 | 7.109 | -73.004 | 22.1 | 2 |
|  | 1018-17 | La Corcova Quartzomonzonite | 2730 | 7.109 | -72.999 | 26.9 | 3.9 |
|  | 1018-18 | La Corcova Quartzomonzonite | 3230 | 7.107 | -72.980 | 15.3 | 1.3 |
|  | 1018-19 | Paramo Rico Granodiorite | 3508 | 7.208 | -72.885 | 18.2 | 1.1 |
|  | 1018-20 | Bucaramanga gneiss | 3808 | 7.247 | -72.896 | 13.6 | 0.7 |
|  | 996-4 | Tabalazo | 1469 | 7.284 | -73.021 | 10.8 | 3.5 |
| Caballero et al., 2013b | 996-27 | Bocas | 692 | 7.219 | -73.159 | 46 | 6.6 |
|  | 996-39 | Intrusive | 1784 | 7.119 | -73.059 | 13.5 | 2.1 |
|  | 996-33 | Bucaramanga gneiss | 909 | 6.867 | -72.987 | 14.2 | 2.6 |
|  | 996-41 | Bucaramanga gneiss | 1218 | 7.128 | -73.099 | 18.1 | 3 |
|  | 996-2 | Silgara shist | 1569 | 7.307 | -73.027 | 15.7 | 9.3 |
|  | 996-34 | Intrusive | 874 | 6.867 | -72.991 | 10.4 | 10.6 |
|  | 996-3 | Jordan | 1625 | 7.302 | -73.028 | 23.4 | 4 |
| van Der Lelij, 2016 | 10vdl05 | La Corcova Granodiorite | 2723 | 7.100 | -73.010 | 17.6 | 3.3 |
|  | 10vdl35 | Surata diorite | 878 | 7.172 | -73.085 | 8.5 | 1.5 |
|  | 10vdl61 | Rio Surata granodiorite | 956 | 7.166 | -73.099 | 7.6 | 2.9 |
| van Der Lelij, 2016 | 10vdl22 | Pescadero Granodiorite | 664 | 6.83 | -72.990 | 20 | 3.3 |
|  | 10vdl23 | Bucaramanga gneiss | 2074 | 6.943 | -72.966 | 11.1 | 1.1 |
|  | 10vdl59 | Aguablanca granite | 722 | 7.286 | -73.146 | 10.8 | 2.1 |
|  | 10vdl52 | Paramo Rico Tonalite | 3673 | 7.231 | -72.898 | 11.6 | 1.7 |
|  | 10vdl37 | Berlin orthogneiss | 1692 | 7.19 | -72.978 | 8.5 | 1.5 |
| Villamizar, 2017 | 15SACZ-01 | Corcoba quartzo monzonite | 1460 | 6.918 | -73.001 | 6.6 | 3.15 |
|  | 15SACZ-02A | Bucaramanga Gneiss | 1595 | 6.934 | -72.992 | 6.0 | 2.20 |
|  | 15SACZ-04A | Ortogneiss | 1930 | 6.949 | -72.975 | 8.8 | 2.10 |
|  | 15SACZ-05 | Santa Barbara quatrzo-monzonite | 2110 | 6.938 | -72.966 | 5.5 | 6.50 |
|  | 15SACZ-06 | Santa Barbara quatrzo-monzonite | 2120 | 6.946 | -72.953 | 9.1 | 2.80 |
|  | 15SACZ-07 | Santa Barbara quatrzo-monzonite | 2325 | 6.924 | -72.905 | 13.8 | 4.00 |
|  | 15SACZ-08 | Santa Barbara quatrzo-monzonite | 2690 | 6.906 | -72.887 | 10.6 | 6.50 |
|  | 15SACZ-09A | Santa Barbara quatrzo-monzonite | 2927 | 6.915 | -72.872 | 5.0 | 2.60 |
|  | 15SACZ-12A | Metasandstone | 2806 | 6.905 | -72.865 | 8.9 | 1.60 |
| Amaya et al., 2019 | 12SACEP06 | Silgara schist | 757 | 6.764 | -72.986 | 19.6 | 9.60 |
|  | 12SACEP08 | Silgara schist | 952 | 6.778 | -72.995 | 12.9 | 4.60 |
|  | 12SACEP13 | Silgara schist | 826 | 6.796 | -73.014 | 7.3 | 4.60 |
|  | 12SACEP16 | Silgara schist | 1202 | 6.798 | -72.997 | 18.9 | 7.10 |
|  | 12SACEP17 | Silgara schist | 1347 | 6.779 | -73.002 | 34.5 | 17.50 |
|  | 13SACZ01 | Silgara schist | 954 | 6.778 | -72.995 | 36.2 | 5.80 |
|  | 13SACZ04a | Bucaramanga Gneiss | 1022 | 6.774 | -72.952 | 6.9 | 2.40 |
|  | 13SACZ04b | Bucaramanga Gneiss | 1022 | 6.774 | -72.952 | 25.3 | 7.70 |
|  | 12SACEP11 | Silgara schist | 612 | 6.816 | -73.007 | 21.4 | 5.50 |
|  | 12SACEP14 | Silgara schist | 1063 | 6.803 | -73.004 | 18.5 | 4.80 |
| Velandia 2017 | FV-07 | Quatrzo-monzonite | 1010 | 6.752 | -72.951 | 22.4 | 3.10 |
| Shagam et al., 1984 | C-78-1 | Bi-qz-f.orthogneiss | 3400 | 7.240 | -72.821 | 6.1 | 0.70 |
|  | C-78-1 | Bi-qz-f. orthogneiss | 3400 | 7.240 | -72.821 | 6.1 | 0.60 |
|  | BC-79-1 | Pescadero pink bi-granite | 650 | 6.841 | -72.990 | 13.8 | 1.90 |
|  | BC-79-1 | Pescadero pink bi-granite | 650 | 6.841 | -72.990 | 13.7 | 1.70 |
|  | BC-79-3 | Sta.Barbara qz-monzonite | 2100 | 6.949 | -72.952 | 7.3 | 1.10 |
|  | BC-79-3 | Sta.Barbara qz-monzonite | 2100 | 6.949 | -72.952 | 7.1 | 1.20 |
|  | BC-79-4 | Bucaramanga -qz-f.gneiss | 1950 | 6.944 | -72.971 | 12.4 | 1.50 |
|  | BC-79-5 | Corcova grayqz-monzonite | 1500 | 6.930 | -72.994 | 5.5 | 1.00 |
|  | BC-79-6 | Silgara micaschist | 625 | 6.814 | -73.008 | 18.9 | 2.20 |
|  | BC-79-11 | Bucaramanga bi-qz-f.gneiss | 3550 | 7.300 | -72.890 | 5.0 | 0.60 |
|  | BC-79-11 | Bucaramanga bi-qz-f.gneiss | 3550 | 7.300 | -72.890 | 4.2 | 0.50 |
|  | BC-79-12 | Bi-qz-f.orthogneiss | 3700 | 7.257 | -72.900 | 6.5 | 0.90 |
|  | BC-79-13 | ParamoRicohbl-bi tonalite/granodiorite | 3680 | 7.232 | -72.903 | 16.0 | 2.50 |
|  | BC-79-14 | Sta.Barbara qz-monzonite | 3460 | 7.205 | -72.886 | 13.6 | 1.80 |

| **Table S2b**: Previous ZFT data used in this study | | | | | | | |
| --- | --- | --- | --- | --- | --- | --- | --- |
| **Reference** | **Sample ID** | **Formation** | **Elevation** | **Latitude (°N)** | **Longitude (°E)** | **Age (Ma)** | **Error (1σ)** |
| Amaya et al., 2017 | 07SACZ-15 | Bucaramanga Gneiss | 1239 | 7.125 | -72.958 | 19.2 | 2 |
|  | 07SACZ-17 | Bucaramanga Gneiss | 1779 | 7.109 | -73.061 | 24.1 | 1.6 |
|  | 13SACZ-30 | Silgará schist | 3077 | 7.106 | -72.993 | 112.9 | 10.2 |
|  | 13SACZ-31 | Orthogneiss | 3217 | 7.104 | -72.969 | 122 | 33.9 |
|  | 13SACZ-32 | Giron (?) | 3400 | 7.105 | -72.969 | 123 | 10.4 |
|  | 12SACZ-8 | Bucaramanga Gneiss | 3356 | 7.241 | -72.823 | 67.4 | 5.1 |
|  | 12SACZ-10B | Bucaramanga Gneiss | 3367 | 7.237 | -72.817 | 66.4 | 11.5 |
|  | 12SACZ-16 | Silgará schist | 3482 | 7.237 | -72.796 | 71.6 | 5.3 |
|  | 13SACZ-10 | Orthogneiss | 3340 | 7.237 | -72.817 | 111.8 | 15.5 |
|  | 13SACZ-18 | Tambor | 2526 | 7.302 | -72.95 | 91.4 | 5.4 |
|  | 13SACZ-21 | Silgará schist | 1425 | 7.280 | -73.019 | 89.4 | 23.5 |
|  | 13SACZ-24 | Silgará schist | 1575 | 7.313 | -73.029 | 23.4 | 4.8 |
|  | 13SACZ-25 | Jurassic intrusion | 1584 | 7.309 | -73.032 | 37.5 | 5.4 |
|  | 12SACZ-13 | Bucaramanga Gneiss | 3336 | 7.192 | -72.899 | 154.7 | 36.7 |
|  | 13SACZ-11 | Bucaramanga Gneiss | 3323 | 7.1915 | -72.865 | 136.6 | 60.06 |
| van Der Lelij 2016 | 10vdl59 | Aguablanca granite | 722 | 7.286 | -73.146 | 37.4 | 4 |
| 10vdl61 | Rio Surata granodiorite | 956 | 7.166 | -73.099 | 38.3 | 4.3 |
|  | 10vdl05 | La Corcova Granodiorite | 2723 | 7.100 | -73.01 | 44.1 | 4.6 |
|  | 10vdl23 | Bucaramanga gneiss | 2074 | 6.943 | -72.966 | 124.8 | 12.7 |
|  | 10vdl37 | Berlin orthogneiss | 1692 | 7.19 | -72.978 | 167.1 | 15 |
|  | 10vdl22 | Pescadero Granodiorite | 664 | 6.83 | -72.990 | 172 | 16.4 |
|  | 10vdl52 | Paramo Rico Tonalite | 3673 | 7.231 | -72.898 | 227.2 | 22.1 |
| Villamizar, 2017 | 15SACZ-01 | Corcoba quartz onzonite | 1460 | 6.918 | -73.001 | 26.4 | 7.4 |
|  | 15SACZ-02A | Bucaramanga Gneiss | 1595 | 6.934 | -72.992 | 25.9 | 4.2 |
|  | 15SACZ-04A | Ortogneiss | 1930 | 6.949 | -72.975 | 94.9 | 14.8 |
|  | 15SACZ-05 | Santa Barbara quatrzo-monzonite | 2110 | 6.938 | -72.966 | 113.4 | 21.3 |
|  | 15SACZ-06 | Santa Barbara quatrzo-monzonite | 2120 | 6.946 | -72.953 | 100.4 | 16.3 |
|  | 15SACZ-07 | Santa Barbara quatrzo-monzonite | 2325 | 6.924 | -72.905 | 132.4 | 26.4 |
|  | 15SACZ-08 | Santa Barbara quatrzo-monzonite | 2690 | 6.906 | -72.887 | 114.9 | 29.5 |
|  | 15SACZ-09A | Santa Barbara quatrzo-monzonite | 2927 | 6.915 | -72.872 | 112.9 | 22.1 |
|  | 15SACZ-10A | Giron | 2572 | 6.845 | -72.810 | 256.4 | 79.4 |
|  | 15SACZ-12A | Metasandstone | 2806 | 6.905 | -72.865 | 173.9 | 34.5 |
|  | 15SACZ-13 | Tambor | 2430 | 6.922 | -72.840 | 415.4 | 113.2 |
|  | 15SACZ-14 | Tambor | 2828 | 6.952 | -72.824 | 378.0 | 139.1 |
|  | 15SACZ-15A | Metasandstone | 3194 | 6.977 | -72.825 | 191.8 | 92.5 |
|  | 15SACZ-16B | Metasandstone | 3896 | 7.046 | -72.807 | 168.0 | 42.3 |
|  | 15NJ10 | Pescadero granite | 1293 | 6.918 | -73.007 | 150.2 | 73.9 |
|  | 15NJ11 | Pescadero granite | 1459 | 6.919 | -73.017 | 158.8 | 45.7 |
|  | 15NJ12 | Tambor | 1680 | 6.918 | -73.034 | 354.0 | 34.0 |
| Amaya et al., 2019 | 12SACEP02 | Silgara schist | 651 | 6.754 | -72.984 | 264.8 | 110.9 |
|  | 12SACEP05 | Silgara schist | 741 | 6.762 | -72.988 | 127.5 | 37.8 |
|  | 12SACEP11 | Silgara schist | 612 | 6.816 | -73.007 | 142.4 | 21.2 |
|  | 12SACEP14 | Silgara schist | 1063 | 6.803 | -73.004 | 166.7 | 32.7 |
|  | 13SACZ02 | Pescadero granite | 1006 | 6.772 | -72.994 | 145.6 | 25.7 |
|  | 13SACZ09 | Pescadero granite | 652 | 6.760 | -72.983 | 122.8 | 18.3 |
|  | 13SACZ03 | Bucaramanga Gneiss | 1050 | 6.774 | -72.951 | 24.6 | 3.9 |
|  | 13SACZ05 | Bucaramana Gneiss | 935 | 6.774 | -72.956 | 88.7 | 28.3 |
|  | 13SACZ07 | Bucaramanga Gneiss | 1003 | 6.780 | -72.960 | 25.1 | 6.3 |
| Velandia 2017 | FV-07 | Quatrzomonzonite | 1010 | 6.752 | -72.951 | 86.6 | 12.7 |
|  | FV-17 | Quatrzomonzonite | 1961 | 6.743 | -72.912 | 31.7 | 2.2 |
| Shagam et al., 1984 | C-78-1 | Bi-qz-f.orthogneiss | 3400 | 7.240 | -72.821 | 50.0 | 6.0 |
|  | C-78-1 | Bi-qz-f.orthogneiss | 3400 | 7.240 | -72.821 | 61.0 | 7.0 |
|  | BC-79-1 | Pescaderopinkbi-granite | 650 | 6.841 | -72.990 | 93.0 | 10.0 |
|  | BC-79-3 | Sta.Barbaraqz-monzonite | 2100 | 6.949 | -72.952 | 91.0 | 11.0 |
|  | BC-79-4 | B'mangabi-qz-f.gneiss | 1950 | 6.944 | -72.971 | 98.0 | 10.0 |
|  | BC-79-5 | Corcovagrayqz-monzonite | 1500 | 6.930 | -72.994 | 66.0 | 7.0 |
|  | BC-79-5 | Corcovagrayqz-monzonite | 1500 | 6.930 | -72.994 | 60.0 | 9.0 |
|  | BC-79-11 | B'mangabi-qz-f.gneiss | 3550 | 7.300 | -72.890 | 67.0 | 7.0 |
|  | BC-79-12 | Bi-qz-f.orthogneiss | 3700 | 7.257 | -72.900 | 109.0 | 10.0 |
|  | BC-79-13 | ParamoRicohbl-bitonalite/granodiorite | 3680 | 7.232 | -72.903 | 94.0 | 8.0 |
|  | BC-79-14 | Sta.Barbaraqz-monzonite | 3460 | 7.205 | -72.886 | 106.0 | 10.0 |

| **Table S2c**: Previous AHe data used in this study | | | | | | | |
| --- | --- | --- | --- | --- | --- | --- | --- |
| **Reference** | **Sample ID** | **Formation** | **Elevation** | **Latitude (°N)** | **Longitude (°E)** | **Age (Ma)** | **Error (1σ)** |
| Mora et al., 2015 | 1018-12 | Bucaramanga gneiss | 1355 | 7.1 | -73.09 | 14.7 | 0.9 |
|  |  |  |  |  |  | 9.36 | 0.6 |
|  |  |  |  |  |  | 10.9 | 0.7 |
|  |  |  |  |  |  | 8.2 | 0.5 |
|  | 1018-19 | Bucaramanga gneiss | 3432 | 7.2 | -72.9 | 12.1 | 0.7 |
|  |  |  |  |  |  | 11.2 | 0.7 |
|  |  |  |  |  |  | 11.6 | 0.7 |
|  |  |  |  |  |  | 10.8 | 0.7 |
|  | 1018-18 | La Corcova Quartzomonzonite | 3107 | 7.1 | -73 | 16 | 0.1 |
| Caballero et al., 2013b | y z08bu07 | Tambor |  | 6.691 | -73.132 | 10.8 | 0.6 |
|  |  |  |  |  |  | 15.5 | 0.9 |
|  |  |  |  |  |  | 13.2 | 0.8 |
|  |  |  |  |  |  | 10.7 | 0.6 |
|  |  |  |  |  |  |  |  |
|  | x z08bu06 | Jordan |  | 6.724 | -73.112 | 11.3 | 0.7 |
|  |  |  |  |  |  | 13 | 0.8 |
|  |  |  |  |  |  | 12.5 | 0.8 |
|  |  |  |  |  |  | 12 | 0.7 |
|  | w z08bu02 | Silgara schist |  | 6.792 | -73.019 | 15.8 | 0.6 |
|  |  |  |  |  |  | 17.6 | 1.1 |
|  |  |  |  |  |  | 16 | 1 |
|  |  |  |  |  |  | 13.5 | 0.8 |
|  | v z08bu01 | Pescadero Granite |  | 6.825 | -72.993 | 13.3 | 0.6 |
|  |  |  |  |  |  | 19.9 | 1.2 |
|  |  |  |  |  |  | 17.1 | 1 |
|  |  |  |  |  |  | 18.3 | 1.1 |
| Velandia, 2017 | FV 63 | Silgarà | 1758 | 6.6852 | -72.8765 | 42.5 | 2.6 |
|  |  |  |  |  |  | 28.3 | 1.8 |
|  |  |  |  |  |  | 16.6 | 1 |

| **Table S2d**: Previous ZHe data used in this study | | | | | | | |
| --- | --- | --- | --- | --- | --- | --- | --- |
| **Reference** | **Sample ID** | **Formation** | **Elevation** | **Latitude (°N)** | **Longitude (°E)** | **Age (Ma)** | **Error (1σ)** |
| Mora et al., 2015 | 1018-20 | Bucaramanga gneiss | 3432 | 7.2476 | -72.896 | 10.7 | 0.9 |
|  |  |  |  |  |  | 15 | 1.2 |
|  |  |  |  |  |  | 15.01 | 1.2 |
|  |  |  |  |  |  | 16.9 | 1.4 |
|  | 1018-11 | Bucaramanga gneiss | 1070 | 7.130 | -73.107 | 20.9 | 1.7 |
|  |  |  |  |  |  | 22.2 | 1.8 |
|  |  |  |  |  |  | 27 | 2.2 |
|  |  |  |  |  |  | 62.5 | 5 |
|  | 1018-12 | Bucaramanga gneiss | 1355 | 7.1224 | -73.085 | 18.2 | 1.5 |
|  |  |  |  |  |  | 18.5 | 1.5 |
|  |  |  |  |  |  | 24.5 | 2 |
|  |  |  |  |  |  | 30.6 | 2.4 |
|  | 1018-13 | Bucaramanga gneiss | 1669 | 7.113 | -73.069 | 24.3 | 1.9 |
|  |  |  |  |  |  | 25.2 | 2.02 |
|  |  |  |  |  |  | 26.7 | 2.1 |
|  |  |  |  |  |  | 27.8 | 2.2 |
|  | 1018-14 | La Corvoca Quartzomonzonite | 1935 | 7.140 | -73.031 | 22.5 | 1.8 |
|  |  |  |  |  |  | 22.5 | 1.8 |
|  |  |  |  |  |  | 24.7 | 2 |
|  |  |  |  |  |  | 28.3 | 2.3 |
|  | 1018-15 | Bucaramanga gneiss | 224 | 7.140 | -73.011 | 20.3 | 1.6 |
|  |  |  |  |  |  | 20.9 | 1.7 |
|  |  |  |  |  |  | 23.8 | 2 |
|  |  |  |  |  |  | 32.7 | 3 |
|  | 1018-17 | La Corvoca Quartzomonzonite | 2826 | 7.109 | -72.999 | 20.4 | 1.6 |
|  |  |  |  |  |  | 25.9 | 2.07 |
|  |  |  |  |  |  | 26.4 | 2.1 |
|  |  |  |  |  |  | 26.9 | 2.2 |
|  | 1018-16 | Bucaramanga gneiss | 2529 | 7.109 | -73.004 | 17 | 1.4 |
|  |  |  |  |  |  | 18 | 1.4 |
|  |  |  |  |  |  | 27.8 | 2.2 |
|  |  |  |  |  |  | 29.5 | 2.4 |
| Mora et al., 2015 | 1018-18 | La Corvoca Quartzomonzonite | 3107 | 7.107 | -72.980 | 16.7 | 1.3 |
|  |  |  |  |  |  | 18.9 | 1.5 |
|  |  |  |  |  |  | 19.9 | 1.6 |
|  |  |  |  |  |  | 20.4 | 1.6 |
|  | 1018-19 | Paramo Rico Granodiorite | 3751 | 7.208 | -72.885 | 53 | 4.2 |
|  |  |  |  |  |  | 53.2 | 4.3 |
|  |  |  |  |  |  | 56.7 | 4.5 |
|  | 08BU11 | San Gil | 1597 | 6.700 | -73.08 | 43.5 | 3.5 |
|  |  |  |  |  |  | 43.8 | 3.5 |
|  |  |  |  |  |  | 56.05 | 4.5 |
|  |  |  |  |  |  | 121.7 | 9.7 |
|  | 08BU10 | Rosablanca | 1570 | 6.707 | -73.076 | 43.9 | 3.5 |
|  |  |  |  |  |  | 49.7 | 4 |
|  |  |  |  |  |  | 59 | 4.7 |
|  |  |  |  |  |  | 86 | 6.9 |
|  | 08BU08 | Tambor | 1241 | 6.706 | -73.097 | 87.1 | 7 |
|  |  |  |  |  |  | 93.8 | 7.5 |
|  |  |  |  |  |  | 144.5 | 11.6 |
|  |  |  |  |  |  | 195.3 | 15.6 |
|  | M9 | Giron | 1533 | 7.3 | -73.2 | 40.1 | 3.2 |
|  |  |  |  |  |  | 41.3 | 3.3 |
|  |  |  |  |  |  | 52.9 | 4.2 |
|  |  |  |  |  |  | 62.4 | 5 |
|  | 08BU05 | Jordan | 455 | 6.8 | -73.1 | 46.3 | 3.7 |
|  |  |  |  |  |  | 62.3 | 5 |
|  |  |  |  |  |  | 66 | 5.3 |
|  |  |  |  |  |  | 78.4 | 6.3 |
| Caballero et al., 2013b | w z08bu02 | Silgra |  | 6.704 | -73.093 | 45.8 | 3.7 |
|  |  |  |  |  |  | 48 | 3.8 |
|  |  |  |  |  |  | 51.4 | 4.1 |
|  |  |  |  |  |  | 55.2 | 4.4 |
| **Reference** | **Sample ID** | **Formation** | **Elevation** | **Latitude (°N)** | **Longitude (°E)** | **Age (Ma)** | **Error (1σ)** |
| **Reference** | **Sample ID** | **Formation** | **Elevation** | **Latitude (°N)** | **Longitude (°E)** | **Age (Ma)** | **Error (1σ)** |
| Caballero et al., 2013 | y z08bu07 | Tambor |  | 6.691 | -73.132 | 53.1 | 4.2 |
|  |  |  |  |  |  | 63.1 | 5 |
|  |  |  |  |  |  | 56.9 | 4.6 |
|  |  |  |  |  |  | 52.4 | 4.2 |
|  | z z08bu09 | Rosablanca |  | 6.663 | -73.150 | 47 | 3.8 |
|  |  |  |  |  |  | 54.2 | 6.7 |
|  |  |  |  |  |  | 47.5 | 3.8 |
|  |  |  |  |  |  | 44.8 | 3.6 |
|  | x z08bu06 | Jordan |  | 6.724 | -73.112 | 78.8 | 6.3 |
|  |  |  |  |  |  | 62.2 | 5 |
|  |  |  |  |  |  | 46.4 | 3.7 |
|  |  |  |  |  |  | 62.4 | 8.2 |
